# Supplementary material
Source: Springer Nature journal article supplement (https://www.springermedizin.de/resource/supplementary/12885_2011_3651_MOESM10_ESM.pdf/9463050)

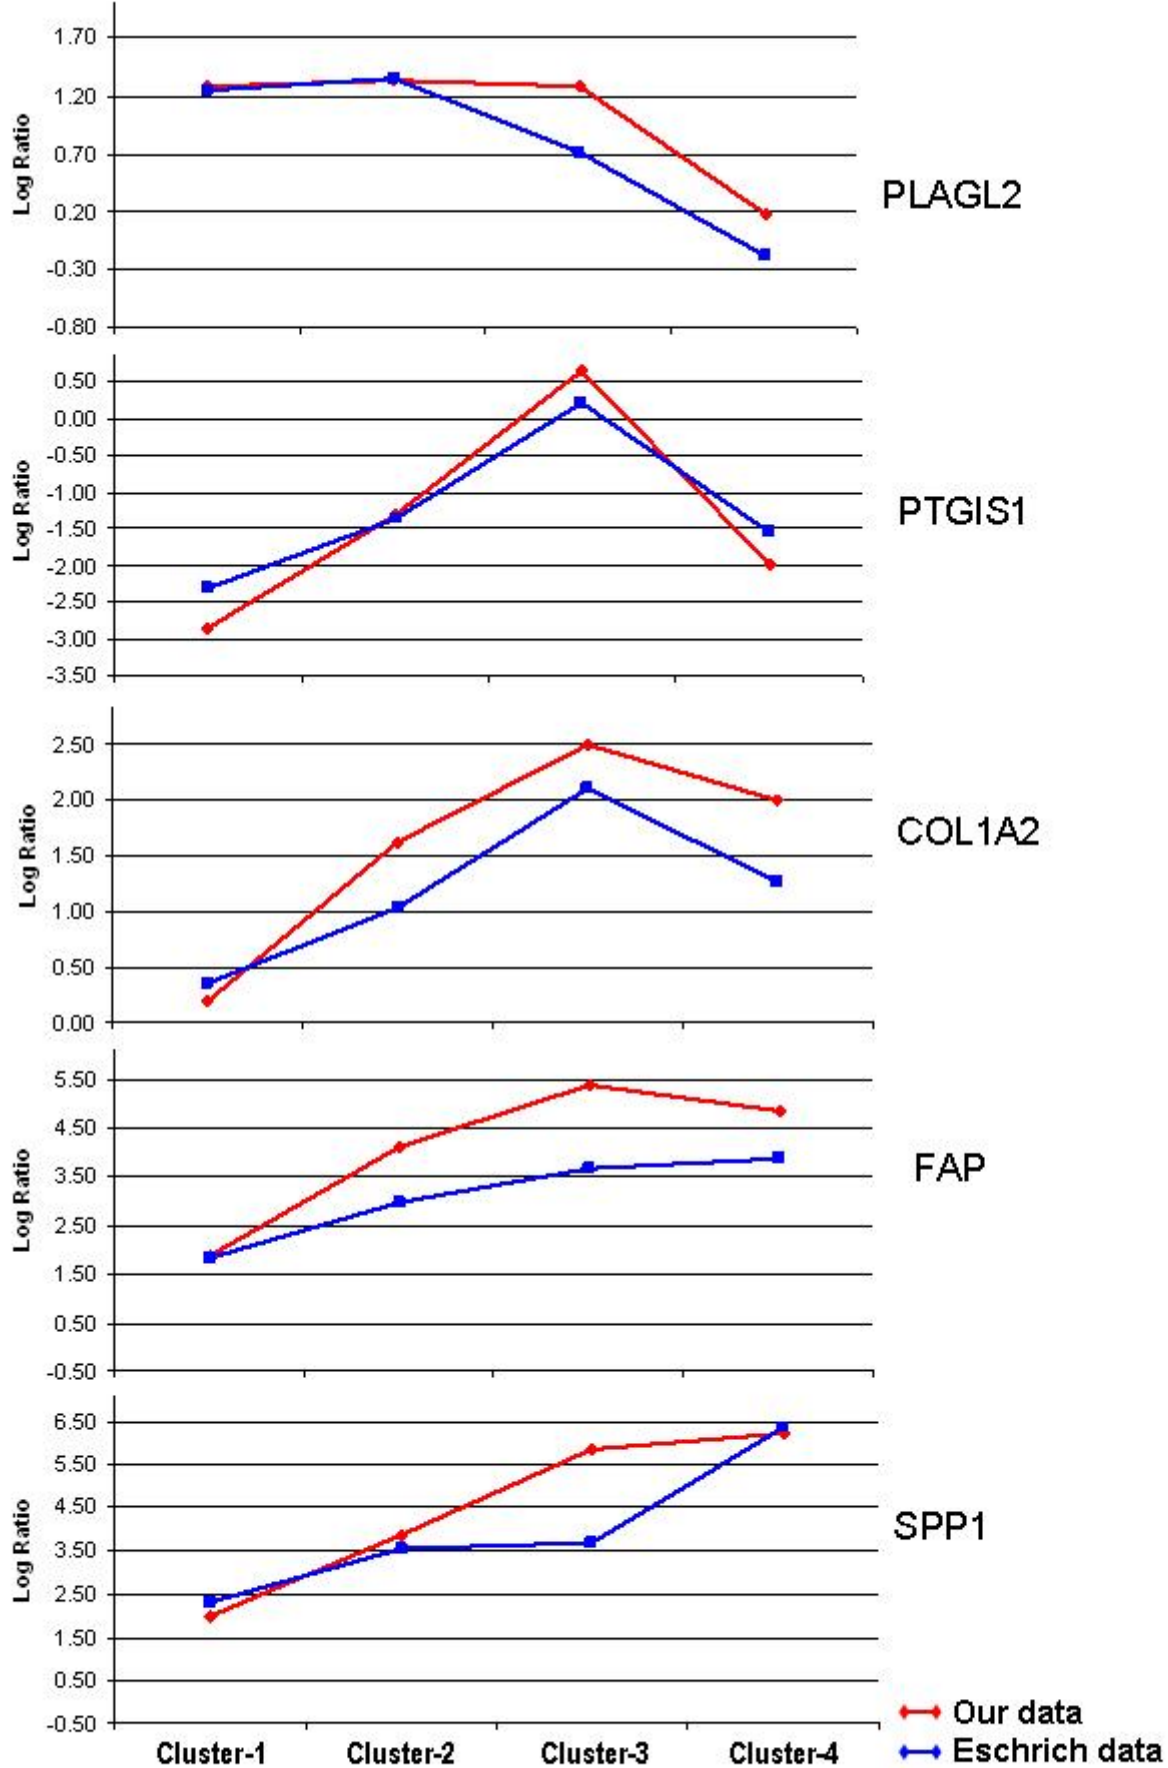

Supplement: MOESM10 [file 9463050]
